# Supplementary material
Source: ML conference proceedings conference paper supplement (https://proceedings.neurips.cc/paper_files/paper/2016/hash/f4f6dce2f3a0f9dada0c2b5b66452017-Abstract.html)
Supplement: Supplementary file 1 [file f4f6dce2f3a0f9dada0c2b5b66452017-Supplemental.zip]

Archive with 1 entries (1 files):
- appendix.pdf
